# Supplementary material for: Registered Trials on Stem Cell Therapy in Liver Diseases: a Cross-sectional Study on ClinicalTrials.gov
Source: Research Square preprint supplement (doi:10.21203/rs.3.rs-1566223/v1), 2022-04-20
Supplement: Supplementary file 1 [file c5628a37ae9b62ebd54b6d3c.xlsx]

## Sheet: Sheet1
Additional file: The detail of characteristics of the 92 included trials.
NCT	stem cell	disease	title	study type	registered year	start year	enrollment	participant age	participant gender	status	study results	result	sponsor	main funding sourse	number of funding sources	location	number of centers	primary purpose	Yes	intervention method	allocation	intervention model	masking	observational model	time perspective
NCT01854125	autologous bone marrow mesenchymal stem cells	Cirrhosis	Autologous Mesenchymal Stem Cell Transplantation in Cirrhosis Patients With Refractory Ascites	interventional	2013	2013	30	18-65	both	Unknown	no results available		hospital	other	1	Asia	1	study the affect and influence of MSCs in the patients,include assay of liver function,variation of ascites,Child-Pugh score etc.	Yes	autologous bone marrow mesenchymal stem cells transplantation	nonrandomized	Single Group Assignment	None (Open Label)	N/A	N/A
NCT01256125	Allogene MSCs Transplantation in Patients With Chronic Liver Diseases Through Peripheral Vein.	Other	Allogene MSCs Transplantation in Patients With Chronic Liver Diseases Through Peripheral Vein.	observational	2010	2010	60	15-65	both	Unknown	no results available		university	other	1	Asia	1	Allogene MSCs transplantation will be performed in patients with chronic liver diseases through peripheral vein and therapeutic effects including short-term effects and long-term follow-up will be compared and investigated.	No	Allogene MSCs transplantation were performed in patients with chronic liver diseases through peripheral vein plus the same medical treatments.	N/A		N/A	case-control	retrospentive
NCT02943707	Autologous bone marrow stem cells	Other	Autologous Bone Marrow Stem Cells Infusion for the Treatment of Liver Diseases. (ABMSCIFTLD)	interventional	2016	2016	40	18-60	both	Unknown	no results available		university	other	1	Asia	1	This study evaluates the effect of autologous bone marrow stem cells infusion (ABMSCi) therapy for liver diseases.	Yes	Autologous bone marrow stem cells are infused into proper hepatic artery	nonrandomized		none(open-lable)	N/A	N/A
NCT03460795	Mesenchymal Stem Cell and Regulatory T Cells	Cirrhosis	Safety and Efficacy Study of Co-transfering of Mesenchymal Stem Cell and Regulatory T Cells in Treating End-stage Liver Disease	interventional	2018	2020	30	18-65	both	not recruiting	no results available		university	other	1	Asia	1	The purpose of this study is to learn whether and how MSCs and Tregs can improve the disease conditions in patients with decompensated cirrhosis.	Yes	MSC and Tregs	N/A	Single Group Assignment	none(open-lable)	N/A	N/A
NCT00655707	Autologous Expanded CD34+ Haemopoietic cells	Other	A Phase I/II Safety and Tolerability Dose Escalation Study of Autologous Stem Cells to Patients With Liver Insufficiency	interventional	2006	2006	5	20-60	both	Completed	has results	All-Cause Mortality 0%，Serious Adverse Events 1/5	university	other	1	Europe	1	The aim of this trial is to determine the maximum tolerated dose of autologous adult stem cells when infused into either the hepatic artery or the portal vein.	Yes	Autologous expanded CD34+ cells obtained by leukapheresis on a single occasion by infusion into the hepatic artery or portal vein.	N/A	Single Group Assignment	none(open-lable)	N/A	N/A
NCT01728727	Human Umbilical Cord Derived Mesenchymal Stem Cells	Cirrhosis	Safety and Efficacy of Human Umbilical Cord Derived Mesenchymal Stem Cells for Treatment of HBV-related Liver Cirrhosis	interventional	2012	2012	240	18-65	both	Unknown	no results available		university	other	5	Asia	5	the patients with HBV-related liver cirrhosis will undergo administration of hUC-MSCs via hepatic artery to evaluate the safety and efficacy of hUC-MSC treatment for these patients.	Yes	UC-MSC transplantation	randomized	Parallel Assignment	none(open-lable)	N/A	N/A
NCT01256138	Allogene MSCs	Other	Allogene MSCs Transplantation in Liver for Patients With Chronic Liver Diseases Through Portal Vein by Ultrasound Guiding	observational	2010	2010	60	15-65	both	Unknown	no results available		university	other	1	Asia	1	Allogene MSCs transplantation will be performed in patients with chronic liver diseases through portal vein by ultrasound guiding and therapeutic effects including short-term effects and long-term follow-up will be compared and investigated.	No	Allogene MSCs transplantation will be performed in patients with chronic liver diseases through portal vein by ultrasound guiding and therapeutic effects.	N/A	N/A	N/A	case-control	retrospective
NCT01412593	Bone Marrow Derived Stem Cells	Cirrhosis	Intra-hepatic Artery Bone Marrow Derived Stem Cells Infusion for the Treatment of Advanced Liver Cirrhosis	interventional	2011	2011	50	18-75	both	Unknown	no results available		university	other	1	Asia	1	Intra-hepatic Artery Bone Marrow Derived Stem Cells Infusion for the Treatment of Advanced Liver Cirrhosis	Yes	Stem cell transplant and Granulocyte colony-stimulating factor	randomized	Parallel Assignment	none(open-lable)	N/A	N/A
NCT00062543	Donor-derived CD34+ cells	Liver fialure	Hepatic Artery Infusion of CD34+ Cells	interventional	2002	2002	0	all	both	Terminated/withdrawn	no results available		hospital	other	1	America	1	The primary objective is to determine whether donor stem cells administered via hepatic artery infusion can produce liver cells in patients with severe hepatic dysfunction post stem cell transplantation (SCT) and the safety of this procedure. The secondary objective is to improve liver function and improve survival.	Yes	Hepatic artery infusion of CD34+ cells	N/A	Single Group Assignment	none(open-lable)	N/A	N/A
NCT01724697	Human Bone Marrow Stem Cells	Cirrhosis	Safety and Efficacy of Human Bone Marrow Stem Cells for Treatment of HBV-related Liver Cirrhosis	interventional	2012	2012	240	18-65	both	Unknown	no results available		university	other	5	Asia	5	the patients with HBV-related liver cirrhosis will undergo administration of human autologous BMSCs via hepatic artery to evaluate the safty and efficacy of human autologous BMSCs treatment for these patients.	Yes	BMSC transplantation	randomized	Parallel Assignment	none(open-lable)	N/A	N/A
NCT03109236	Autologous Endothelial Progenitor Cell	Cirrhosis	Autologous Endothelial Progenitor Cell Therapy for Reversal of Liver Cirrhosis	interventional	2016	2017	66	21-70	both	recruiting	no results available		hospital	other	5	Asia	5	to determine the potential of using autologous CD133+ cells to reverse fibrosis and improve clinical outcome for patients with end stage cirrhosis.	Yes	CD133+ cells transplantation	randomized	Parallel Assignment	single	N/A	N/A
NCT00420134	Autologous Mesenchymal Stem Cell	Liver fialure	Improvement of Liver Function in Liver Cirrhosis Patients After Autologous Mesenchymal Stem Cell Injection:a Phase I-II Clinical Trial	interventional	2006	2006	30	≥18	both	Completed	no results available		university	other	2	Asia	2	The investigators determine the effects of injected cells in reestablishment of liver function.	Yes	injection of progenitor of hepatocyte drived from Mesenchymal stem cell	randomized	Single Group Assignment	single	N/A	N/A
NCT03632148	Liver MSCs or Adult Derived Human Liver Stem/progenitor Cells (ADHLSCs)	Cirrhosis	Effect of Liver MSCs in Blood of Patients With Liver Disease. (CIRRHOTIQUE01)	observational	2017	2017	9	12-80	both	Completed	no results available		university	other	1	Europe	1	The aim of this study is to evaluate the effect of ADHLSCs in cirrhotic blood compared to control blood.	No		N/A	N/A	N/A	cohort	cross-sectional
NCT01025622	CD133+ stem cells (SCs)	Cirrhosis	Intrahepatic Reinfusion of CD133+ Stem Cells in Cirrhotic Patients (Cirrhosis133)	interventional	2009	2009	12	≥18	both	Unknown	no results available		university	other	1	Europe	1	To assess the safety of the intrahepatic reinfusion of increasing numbers of autologous highly purified CD133+ stem cells (SCs) to patients with end-stage liver disease. To assess the feasibility of the immunomagnetic selection of autologous CD133+ cells collected with leukapheresis from the peripheral blood (PB) of patients with end-stage liver disease, previously mobilized with G-CSF. To assess…	Yes	autologous highly purified CD133+ stem cells (SCs) Intrahepatic reinfusion in cirrhotic patients	N/A	Single Group Assignment	none(open-lable)	N/A	N/A
NCT01728688	Autologous Peripheral Blood Stem Cells	Cirrhosis	Safety and Efficacy of Human Autologous Peripheral Blood Stem Cells for Treatment of HBV-related Liver Cirrhosis	interventional	2012	2012	240	18-65	both	Unknown	no results available		university	other	5	Asia	5	The patients with HBV-related liver cirrhosis will undergo administration of human autologous PBSCs via hepatic artery to evaluate the safety and efficacy of human autologous PBSCs treatment for these patients.	Yes	After three days G-CSF mobilization, Patients randomized to the intervention arm will receive autologous PBSCs transplantation at day1, and receive conventional treatment and antiviral treatment through the one year study visit and followed until one years study visit.	randomized	Parallel Assignment	none(open-lable)	N/A	N/A
NCT01661842	Umbilical Cord Mesenchymal Stem Cells	AILD	Umbilical Cord Mesenchymal Stem Cells for Patients With Autoimmune Hepatitis	interventional	2011	2011	100	18-65	both	Unknown	no results available		hospital	other	1	Asia	1	In this study, the safety and efficacy of UC-MSC transplantation for AIH patients will be evaluated.	Yes	conventional plus UC-MSC treatment	randomized	Parallel Assignment	none(open-lable)	N/A	N/A
NCT01729221	autologous mesenchymal stem cells (MSC)	Liver cancer	Application of the Stem Cell Therapy in the End Stage Liver Disease and Assessment Its Consequences in the Quality of Live Style as Well as Development of HCC.	observational	2010	2010	280	20-65	both	Unknown	no results available		university	other	1	Africa	1	whether stem cell therapy affecets the incidence of hepatocellular carcinoma in hepatitis C virus infected patients.	No	Hepatitis C virus infected patients treated by stem cell therapy	N/A	N/A	N/A	cohort	prospective
NCT01483248	Human Menstrual Blood-derived Mesenchymal Stem Cells	Cirrhosis	Human Menstrual Blood-derived Mesenchymal Stem Cells for Patients With Liver Cirrhosis	interventional	2010	2010	50	20-50	only female	Unknown	no results available		industry/company	industry	5	Asia	5	.In this study, the safety and efficacy of menstrual blood-derived stem cells transplantation for patients with liver cirrhosis will be evaluated.	Yes	conventional therapy plus MenSC transplantation	N/A	Single Group Assignment	none(open-lable)	N/A	N/A
NCT03863002	Mesenchymal Stem Cell	Liver fialure	Safety and Efficacy of Mesenchymal Stem Cell Transplantation for Acute-on-Chronic Liver Failure	interventional	2019	2019	45	16-60	both	not recruiting	no results available		industry/company	industry	2	Asia	2	Safety and Efficacy of Mesenchymal Stem Cell Transplantation for Acute-on-Chronic Liver Failure	Yes	Mesenchymal Stem Cell	randomized	Parallel Assignment	none(open-lable)	N/A	N/A
NCT04822922	Human umbilical cord-derived mesenchymal stem cells (hUC-MSCs)	Liver fialure	Safety of UC-MSC Transfusion for ACLF Patients	interventional	2021	2021	16	18-70	both	not recruiting	no results available		university	other	1	Asia	1	This study aims to explore the safety of umbilical cord mesenchymal stem cells (UC-MSCs) in the treatment of ACLF.	Yes	Human umbilical cord-derived mesenchymal stem cells (hUC-MSCs)	nonrandomized	Parallel Assignment	none(open-lable)	N/A	N/A
NCT03668171	mesenchymal stem cell	Liver fialure	Mesenchymal Stem Cell Transplantation for Acute-on-chronic Liver Failure	interventional	2017	2017	200	18-70	both	Unknown	no results available		hospital	other	1	Asia	1	This study aimed to investigate the efficacy of mesenchymal stem cells in ACLF patients.	Yes	mesenchymal stem cell transplantation or placebo infusion via peripheral vein	randomized	Parallel Assignment	quadruple	N/A	N/A
NCT02812121	umbilical cord blood mesenchymal stem cells	Liver fialure	UC-MSC Infusion for HBV-Related Acute-on-Chronic Liver Failure	interventional	2016	2016	261	18-65	both	Unknown	no results available		university	other	1	Asia	1	In this study, we intend to assess the safety and efficacy of umbilical cord blood derived MSCs for HBV-related ACLF patients.	Yes	umbilical cord blood mesenchymal stem cells	randomized	Parallel Assignment	none(open-lable)	N/A	N/A
NCT00147043	adult stem cells	Cirrhosis	Adult Stem Cell Therapy in Liver Insufficiency	interventional	2005	2005	5	20-65	both	Completed	has results	All the Participants had improvement in liver function,there were no adverse events	university	other	1	Europe	1	In order to determine the clinical application potential of adult stem cells we propose to investigate the safety and toxicity of infusing adult stem cells in the hepatic artery or portal vein of five patients with chronic liver insufficiency and to identify any clinical benefit if such occurs.	Yes	Infusion of stem cells via image guided scan	N/A	Single Group Assignment	none(open-lable)	N/A	N/A
NCT01218464	umbilical cord mesenchymal stem cells (UC-MSCs)	Liver fialure	Safety and Efficacy of Human Mesenchymal Stem Cells for Treatment of Liver Failure	interventional	2009	2009	70	18-70	both	Unknown	no results available		hospital	other	1	Asia	1	The purpose of this study is to investigate the safety and initial efficacy of human umbilical cord MSC (UC-MSCs) treatment for patients with LF.	Yes	Conventional plus MSC treatment	randomized	Parallel Assignment	double	N/A	N/A
NCT02857010	Allogenic Bone Marrow Mesenchymal Stem Cell	Liver fialure	Allogenic Bone Marrow Mesenchymal Stem Cell Therapy in Acute-on-chronic Liver Failure (Liveradvance)	interventional	2012	2012	30	18-79	both	Unknown	no results available		hospital	other	1	America	3	evaluate the clinical efficacy of allogenic bone marrow derived mesenchymal stem cells in cirrhotic patients with acute-on-chronic liver failure	Yes	Allogenic mesenchymal stem cells	randomized	Parallel Assignment	triple	N/A	N/A
NCT03860155	Allogeneic ABCB5-positive Stem Cells	Liver fialure	Allogeneic ABCB5-positive Stem Cells for Treatment of Acute-on-Chronic Liver Failure	interventional	2019	2019	18	20-75	both	not recruiting	no results available		industry/company	industry	3	Europe	3	The study objective is to investigate the efficacy and safety of three i.v. doses of the investigational medicinal product (IMP) allo-APZ2-ACLF for the treatment of acute-on-chronic liver failure (ACLF).	Yes	allo-APZ2-ACLF	N/A	Single Group Assignment	none(open-lable)	N/A	N/A
NCT01491165	umbilical cord mesenchyma stem cell	Cirrhosis	Safety and Efficacy of Stem Cell Transplantation for Treatment of Liver Cirrhosis	interventional	2011	2011	75	18-60	both	Unknown	no results available		hospital	other	3	Asia	3	In this study, the safety and efficacy of umbilical cord mesenchyma stem cell transplantation through interventional procedures in patients liver cirrhosis will be evaluated.	Yes	stem cell transplantation through interventional procedures	N/A	Single Group Assignment	none(open-lable)	N/A	N/A
NCT01724398	Umbilical Cord Mesenchymal Stem Cells	Liver fialure	Umbilical Cord Mesenchymal Stem Cells Transplantation Combined With Plasma Exchange for Patients With Liver Failure	interventional	2012	2012	120	16-65	both	Unknown	no results available		hospital	other	1	Asia	1	In this study, safety and efficacy of human umbilical cord mesenchymal stem cells (UC-MSCs) transplantation combined with plasma exchange (PE) for patients with liver failure caused by hepatitis B Virus will be evaluated.	Yes	Conventional plus UC-MSC treatment	randomized	Parallel Assignment	none(open-lable)	N/A	N/A
NCT01844063	human bone marrow and umbilical cord mesenchymal stem cells transplantation	Liver fialure	Safety and Efficacy of Diverse Mesenchymal Stem Cells Transplantation for Liver Failure	interventional	2013	2013	210	16-65	both	Unknown	no results available		hospital	other	1	Asia	1	In this study, we assess the safety and efficacy of human bone marrow and umbilical cord mesenchymal stem cells transplantation for patients with HBV-LF.	Yes	Conventional plus BM-MSC treatment	randomized	Parallel Assignment	none(open-lable)	N/A	N/A
NCT01120925	Autologous Bone Marrow Derived Stem Cells	Cirrhosis	Autologous Bone Marrow Derived Stem Cells in Decompensate Cirrhotic Patients	interventional	2010	2010	30	16-65	both	Completed	no results available		university	other	2	Asia	2	the investigators will study safety and feasibility of twice transplantation of Autologous bone derived marrow mono nuclear (BM-MNC) and enriched CD133+ hematopoietic stem cell through the portal vein in patients with decompensate cirrhosis.	Yes	Biological: MNC；Biological: CD133；Biological: Control	randomized	Parallel Assignment	quadruple	N/A	N/A
NCT03529136	Umbilical Cord Mesenchymal Stem Cell	Cirrhosis	Clinical Trial of Umbilical Cord Mesenchymal Stem Cell Transfusion in Decompensated Liver Cirrhosis	interventional	2018	2018	252	18-65	both	Unknown	no results available		industry/company	industry	1	Asia	5	This study aim to evaluate the safety and efficiency of human umbilical cord mesenchymal stem cell transfusion in patients with decompensated liver cirrhosis, and explore the best protocol of MSC transfusion.	Yes	UC-MSC	nonrandomized	Parallel Assignment	none(open-lable)	N/A	N/A
NCT04243681	combination of hematopoetic and mesenchymal stem cell in patients of liver cirrhosis	Cirrhosis	Combination of Autologous MSC and HSC Infusion in Patients With Decompensated Cirrhosis	interventional	2019	2019	5	20-70	both	Completed	no results available		university	other	1	Asia	1	To assess the safety of combination of hematopoetic and mesenchymal stem cell in patients of liver cirrhosis	Yes	CD 34 and MSC infusion	nonrandomized	Parallel Assignment	none(open-lable)	N/A	N/A
NCT03838250	Autologous Human Bone Marrow-Derived MSCs	Cirrhosis	Study to Evaluate Hepatic Artery Injection of Autologous Human Bone Marrow-Derived MSCs in Patients With Alcoholic LC	interventional	2019	2019	10	18-70	both	recruiting	no results available		industry/company	industry	1	America	1	This study is to evaluate the safety and efficacy of a single dose of Cellgram™ delivered via hepatic artery in patients with decompensated alcoholic liver cirrhosis.	Yes	Cellgram™ (Bone marrow-derived MSCs)	N/A	Single Group Assignment	none(open-lable)	N/A	N/A
NCT02652351	Human umbilical cord mesenchymal stem cells	Cirrhosis	Human Umbilical Cord-Mesenchymal Stem Cells for Hepatic Cirrhosis	interventional	2016	2016	20	18-80	both	Unknown	no results available		industry/company	industry	2	Asia	2	The purpose of this study is to evaluate the safety and efficacy of human umbilical cord mesenchymal stem cell(hUC-MSC) for Hepatic Cirrhosis.	Yes	Human umbilical cord mesenchymal stem cells	N/A	Single Group Assignment	none(open-lable)	N/A	N/A
NCT01224327	umbilical cord Mesenchymal Stem Cells	Cirrhosis	Umbilical Cord Mesenchymal Stem Cells Infusion Via Hepatic Artery in Cirrhosis Patients	interventional	2010	2010	50	18-70	both	Unknown	no results available		university	other	1	Asia	1	The purpose of this study is to investigate the efficacy of umbilical cord mesenchymal stem cells (MSCs) infusion via hepatic artery in the treatment of liver cirrhosis.	Yes	umbilical cord Mesenchymal Stem Cells	randomized	Parallel Assignment	none(open-lable)	N/A	N/A
NCT03209986	mesenchymal stem cell	Cirrhosis	Trial of Mesenchymal Stem Cell Transplantation in Decompensated Liver Cirrhosis	interventional	2017	2017	200	18-65	both	Unknown	no results available		hospital	other	1	Asia	1	This study aimed to investigate the safety and efficacy of mesenchymal stem cells in hepatitis B and C related liver cirrhosis patients.	Yes	mesenchymal stem cell transplantation via peripheral vein	randomized	Parallel Assignment	single	N/A	N/A
NCT02705742	Mesenchymal Stem Cells	Cirrhosis	Mesenchymal Stem Cells Transplantation for Liver Cirrhosis Due to HCV Hepatitis	interventional	2016	2016	5	18-70	both	Unknown	no results available		university	other	1	Asia	1	In this study, investigators aimed to transplant autologous, adipose tissue derived mesenchymal stem cells to the patients with liver cirrhosis due to HCV.	Yes	Mesenchymal Stem Cells Transplantation	N/A	Single Group Assignment	none(open-lable)	N/A	N/A
NCT02943889	autologous bone marrow derived mesenchymal stem cells	Cirrhosis	Stem Cell Transplantation in Cirrhotic Patients	interventional	2016	2016	40	All	both	Unknown	no results available		university	other	1	Africa	1	This study aimed to transplant autologous bone marrow derived mesenchymal stem cells to the patients with liver cirrhosis to assess liver tissue regeneration, efficacy and safety of stem cell therapy and finally to establish an alternative treatment modality to liver transplantation.	Yes	Mesenchymal stem cell transplantation	nonrandomized	Parallel Assignment	double	N/A	N/A
NCT01877759	Mesenchymal stem cell derived from human Bone Marrow & umbilical cord	Cirrhosis	A Clinical Study to Evaluate the Safety and Efficacy of Mesenchymal Stem Cells in Liver Cirrhosis	interventional	2013	2013	20	25-65	both	Unknown	no results available		hospital	other	1	Asia	1	Access Role of Bone Marrow Derived Autologous Stem Cells + Human Umbilical Cord Derived Mesenchymal Stem Cells for the Treatment of Liver Cirrhosis	Yes	Intravenous dose of Mesenchymal stem cell derived from human Bone Marrow & umbilical cord , IN 6 divided doses , at interval of 1 week .	N/A	Single Group Assignment	none(open-lable)	N/A	N/A
NCT03626090	Autologous BM MSC	Cirrhosis	Mesenchymal Stem Cell Therapy for Liver Cirrhosis	interventional	2018	2018	20	21-69	both	recruiting	no results available		industry/company	industry	1	Asia	3	The objective of the study is to demonstrate that autologous bone marrow is safe to be used in patients with liver cirrhosis as well as demonstrate that bone marrow MSC may improve liver function and prolong patient survival.	Yes	Autologous BM MSC	N/A	Single Group Assignment	none(open-lable)	N/A	N/A
NCT02786017	human umbilical cord-derived mesenchymal stem cells (HUC-MSCs)	Cirrhosis	Injectable Collagen Scaffold™ Combined With HUC-MSCs Transplantation for Patients With Decompensated Cirrhosis	interventional	2016	2016	40	≥18	both	Unknown	no results available		university	other	2	Asia	2	The purpose of this study is to assess the safety and efficacy of injectable collagen scaffold combined with human umbilical cord-derived mesenchymal stem cells (HUC-MSCs) transplantation in patients with Decompensated Cirrhosis.	Yes	Injectable Collagen Scaffold + HUC-MSCs	randomized	Parallel Assignment	double	N/A	N/A
NCT01499459	Autologous Mesenchymal Stem Cell	Cirrhosis	Autologous Mesenchymal Stem Cell Transplantation in Liver Cirrhosis	interventional	2008	2008	25	18-80	both	Unknown	no results available		university	other	1	Asia	1	This study is aiming to investigate the efficacy of autologous mesenchymal stem cell (MSC) transplantation in 25 randomized patients with liver cirrhosis autologous mesenchymal stem cell will be derived from patients' bone marrows and will be infused via peripheral vein.	Yes	autologous mesenchymal stem cell transplantation	N/A	Single Group Assignment	none(open-lable)	N/A	N/A
NCT03945487	umbilical cord-derived mesenchymal stem cell	Cirrhosis	Mesenchymal Stem Cells Treatment for Decompensated Liver Cirrhosis	interventional	2019	2019	200	18-69	both	recruiting	no results available		hospital	other	1	Asia	1	examined the longer-term safety and efficacy of UC-MSC in patients with decompensated liver cirrhosis.	Yes	umbilical cord-derived mesenchymal stem cell	randomized	Parallel Assignment	none(open-lable)	N/A	N/A
NCT01429038	Mesenchymal Stem Cells	Liver fialure	Mesenchymal Stem Cells After Renal or Liver Transplantation	interventional	2012	2012	40	18-75	both	not recruiting	no results available		university	other	1	Europe	1	The present project aims at evaluating the safety and tolerability of MSC administration after liver or kidney transplantation.	Yes	Mesenchymal Stem Cells	nonrandomized	Parallel Assignment	none(open-lable)	N/A	N/A
NCT01220492	Umbilical Cord Mesenchymal Stem Cells for Patients With Liver Cirrhosis	Cirrhosis	Umbilical Cord Mesenchymal Stem Cells for Patients With Liver Cirrhosis	interventional	2009	2009	266	18-65	both	Completed	no results available		hospital	other	1	Asia	1	prove a hypothesis that umbilical cord-derived MSCs (UC-MSC) can also improve the disease conditions of LC patients, particularly reducing the decompensated conditions in these patients.	Yes	Umbilical Cord Mesenchymal Stem Cells for Patients With Liver Cirrhosis	randomized	Parallel Assignment	none(open-lable)	N/A	N/A
NCT01573923	Umbilical Mesenchymal Stem Cells	Cirrhosis	Safety and Efficacy Study of Umbilical Mesenchymal Stem Cells for Liver Cirrhosis	interventional	2014	2014	320	30-60	both	Unknown	no results available		industry/company	industry	1	Asia	1	determine the safety and efficacy of intravenous administration of umbilical mesenchymal stem cells in the treatment of patients with liver cirrhosis in next three years.	Yes	Umbilical Mesenchymal Stem Cells transplantation	nonrandomized	Parallel Assignment	none(open-lable)	N/A	N/A
NCT01342250	Human Umbilical Cord Mesenchymal Stem Cells	Cirrhosis	Human Umbilical Cord Mesenchymal Stem Cells Transplantation for Patients With Decompensated Liver Cirrhosis	interventional	2010	2010	20	18-70	both	Completed	no results available		industry/company	industry	1	Asia	1	the safety and efficacy of human umbilical cord mesenchymal stem cells (hUC-MSCs) transplantation for patients with decompensated liver cirrhosis will be evaluated.	Yes	Human Umbilical Cord Mesenchymal Stem Cells Transplantation for Patients With Decompensated Liver Cirrhosis	randomized	Parallel Assignment	none(open-lable)	N/A	N/A
NCT01718587	umbilical cord mesenchyma stem cell	Cirrhosis	Difference in Efficacy Between Stem Cell Transplantation and Classical Therapy in Liver Cirrhosis Patients	interventional	2012	2012	60	18-60	both	Unknown	no results available		hospital	other	2	Asia	2	In this study, the safety and efficacy of umbilical cord mesenchyma stem cell transplantation through interventional procedures and classical therapy in patients liver cirrhosis will be evaluated and compared.	Yes	UCMSC transplantation	randomized	Parallel Assignment	none(open-lable)	N/A	N/A
NCT03629015	Stemchymal®（Adult Stem Cells）	Liver fialure	Safety Study of Stemchymal® in Acute Liver Failure	interventional	2018	2018	20	20-70	both	Unknown	no results available		industry/company	industry	1	Asia	1	To investigate the safety of Stemchymal® via intravenous (IV) infusion in acute liver failure (ALF) and acute on chronic liver failure (ACLF) patients.	Yes	Stemchymal®	N/A	Sequential Assignment	none(open-lable)	N/A	N/A
NCT01223664	Allogenic Bone Marrow Stem Cells	Cirrhosis	Allogenic Bone Marrow Stem Cells Transplantation in Patients With Liver Cirrhosis	interventional	2010	2010	60	16-65	both	Unknown	no results available		university	other	1	Asia	1	The objective of this study is to evaluate the therapeutic efficacy of allogenic bone marrow stem cells (BMSCs) transplantation in patients with liver cirrhosis.	Yes	Allogenic Bone Marrow Stem Cells Transplantation in Patients With Liver Cirrhosis	nonrandomized	Parallel Assignment	none(open-lable)	N/A	N/A
NCT03254758	adipose-derived mesenchymal stem cells (AD-MSCs)	Cirrhosis	A Study of ADR-001 in Patients With Liver Cirrhosis	interventional	2017	2017	27	≥60	both	Unknown	no results available		industry/company	industry	1	Asia	1	To explore the efficacy and safety of (AD-MSCs) for liver Cirrhosis patients	Yes	adipose-derived mesenchymal stem cells (AD-MSCs) transplantation	N/A	Single Group Assignment	none(open-lable)	N/A	N/A
NCT00993941	autologous bone marrow mesenchymal stem cells (BMSCs)	Cirrhosis	Bone Mesenchymal Stem Cell (BMSC) Transplantation in Liver Cirrhosis Via Portal Vein	interventional	2009	2009	60	18-60	both	Unknown	no results available		university	other	1	Asia	1	The objective of this study is to evaluate the therapeutic efficacy of autologous bone marrow mesenchymal stem cells (BMSCs) transplantation via portal vein in patients with early and middle stage of liver cirrhosis on the basis of HBV infection.	Yes	autologous bone marrow mesenchymal stem cells (BMSCs) transplantation	nonrandomized	Parallel Assignment	none(open-lable)	N/A	N/A
NCT00476060	Autologous mesenchymal stem cell	Cirrhosis	Mesenchymal Stem Cell Transplantation in Decompensated Cirrhosis	interventional	2007	2007	36	18-65	both	Unknown	no results available		university	other	1	Asia	1	The aim of this study is to find efficacy of this new treatment strategy in the setting of a multicenter, randomized placebo-controlled trial in 50 patients with decompensated cirrhosis.	Yes	Autologous mesenchymal stem cell transplantation	randomized	Parallel Assignment	double	N/A	N/A
NCT01233102	Umbilical cord MSCs	Cirrhosis	Mesenchymal Stem Cells Treat Liver Cirrhosis	interventional	2010	2010	200	18-70	both	Suspended	no results available		industry/company	industry	1	Asia	1	The purpose of this study is to investigate the efficacy of umbilical cord mesenchymal stem cells (MSCs) transfusion in the treatment of liver cirrhosis.	Yes	Umbilical Cord Mesenchymal Stem Cell Transfusion	randomized	Parallel Assignment	single	N/A	N/A
NCT00713934	Autologous Bone Marrow Stem Cells	Cirrhosis	Autologous Bone Marrow Stem Cells in Cirrhosis Patients	interventional	2008	2008	7	18-75	both	Completed	no results available		other	other	1	Europe	2	evaluate safety and feasibility of autologous bone marrow mono nuclear (BM-MNC) and enriched CD133+ hematopoietic stem cell transplantation through the portal vein in patients with decompensate cirrhosis.	Yes	Autologous Bone Marrow Stem Cells transplantation	randomized	Parallel Assignment	single	N/A	N/A
NCT00976287	Autologous Bone Marrow Mesenchymal Stem Cells	Cirrhosis	Autologous Bone Marrow Mesenchymal Stem Cells Transplantation Via Hepatic Artery in Patients With Liver Cirrhosis	interventional	2008	2008	50	18-70	both	Unknown	no results available		university	other	2	Asia	2	to investigate the efficacy of autologous bone marrow mesenchymal stem cells (MSCs) transplantation via hepatic artery in the treatment of liver cirrhosis.	Yes	Autologous Bone Marrow Mesenchymal Stem Cells Transplantation	randomized	Parallel Assignment	single	N/A	N/A
NCT01454336	Autologous Mesenchymal Stem Cell	Cirrhosis	Transplantation of Autologous Mesenchymal Stem Cell in Decompensate Cirrhotic Patients With Pioglitazone	interventional	2010	2010	3	18-65	both	Completed	no results available		university	other	1	Europe	1	study the affect of MSCs and Pioglitazone in the process of fibrosis.	Yes	Autologous Mesenchymal Stem Cell	N/A	Single Group Assignment	none(open-lable)	N/A	N/A
NCT02297867	Human Adipose-Derived Stem Cells	Cirrhosis	Clinical Trial Study About Human Adipose-Derived Stem Cells in the Liver Cirrhosis	interventional	2015	2015	6	20-80	both	Completed	no results available		industry/company	industry	1	Asia	1	to investigate the safety and efficacy of autologous ADSCs for the clinical treatment of liver cirrhosis.	Yes	Human Adipose-Derived Stem Cells	N/A	Single Group Assignment	none(open-lable)	N/A	N/A
NCT01333228	Autologous bone marrow-derived endothelial progenitor cells	Cirrhosis	Evaluate Safety and Efficacy of Autologous Bone Marrow-derived Endothelial Progenitor Cells in Advanced Liver Cirrhosis	interventional	2012	2012	14	18-75	both	Completed	no results available		university	other	1	Europe	2	evaluate the safety and therapeutic effects of autologous bone marrow-derived EPCs	Yes	Autologous bone marrow-derived endothelial progenitor cells	N/A	Single Group Assignment	none(open-lable)	N/A	N/A
NCT01309594	Autologous Bone Marrow Transplantation (HIV-ABMi)	Cirrhosis	HIV Liver Regeneration Project for HIV Patients With Cirrhosis by Autologous Bone Marrow Transplantation	interventional	2011	2011	10	20-70	both	Unknown	no results available		other	other	1	Asia	1	evaluate if, and if so how long, autologous bone marrow hematopoietic stem cell transplantation can safely restore liver functions for HIV infected patients who have decompensated liver cirrhosis.	Yes	Hematopoietic stem cell transplantation	N/A	Single Group Assignment	none(open-lable)	N/A	N/A
NCT01108380	autologous peripheral stem cells	Cirrhosis	Evaluation of Liver Regeneration With Autologous Peripheral Stem Cells	interventional	2009	2009	30	20-70	both	Unknown	no results available		hospital	other	2	Asia	2	Evaluation of Liver Regeneration With Autologous Peripheral Stem Cells	Yes	autologous peripheral stem cells transplantation	randomized	Parallel Assignment	none(open-lable)	N/A	N/A
NCT01013194	Human Fetal Liver Cell	Cirrhosis	Human Fetal Liver Cell Transplantation in Chronic Liver Failure	interventional	2007	2007	25	18-70	both	Completed	has results		university	other	2	Europe	2	The herein study consists in the transplantation of liver progenitor cells isolated from human fetal liver tissue with the aim of improving conventional liver therapy and broadening therapeutical options other than liver transplantation.	Yes	Human Fetal Liver Cell Transplantation	nonrandomized	Parallel Assignment	none(open-lable)	N/A	N/A
NCT04088058	autologous Adipose-Derived Stem Cells (ADSCs)	Cirrhosis	A Phase II Open-label Single-arm Study to Evaluate the Efficacy and Safety of ADSCs in Subjects With Liver Cirrhosis	interventional	2020	2020	20	20-70	both	recruiting	no results available		industry/company	industry	1	Asia	1	The aim of the investigators study was to investigate the safety and efficacy of autologous ADSCs for the clinical treatment of liver cirrhosis.	Yes	autologous Adipose-Derived Stem Cells (ADSCs)	N/A	Single Group Assignment	none(open-lable)	N/A	N/A
NCT01741090	Bone Marrow Derived Autologous Mesenchymal Stem Cell	Cirrhosis	The Effectiveness and Safety for Mesenchymal Stem Cell for Alcoholic Liver Cirrhosis	interventional	2009	2009	12	20-60	both	Unknown	no results available		university	other	1	Asia	1	to evaluate safety and effectiveness of new therapy with bone marrow derived autologous mesenchymal stem cell for hepatic failure caused by alcoholic liver cirrhosis.	Yes	mesenchymal stem cell injection	N/A	Single Group Assignment	none(open-lable)	N/A	N/A
NCT01560845	autologous bone marrow stem cells (ABMSC)	Cirrhosis	ABMSC Infusion Through Hepatic Artery in Portal Hypertension Surgery for the Treatment of Liver Cirrhosis	interventional	2010	2010	50	18-60	both	Unknown	no results available		university	other	1	Asia	1	The investigators attempted to infuse autologous bone marrow stem cells (ABMSC) through inserting a catheter into right gastric artery as far as proper hepatic artery after finishing open abdominal portal hypertension surgery. The present study was designed to treat bleeding from esophageal varices and hypersplenism and hopefully to improve the liver function as well.	Yes	Autologous Bone Marrow Stem Cells Infusion Through Hepatic Artery in Open Abdominal Portal Hypertension Surgery	nonrandomized	Parallel Assignment	none(open-lable)	N/A	N/A
NCT03472742	Mesenchymal Stem Cell	Cirrhosis	An Follow-Up Study of Liver Cirrhosis	observational	2018	2018	21	≥20	both	recruiting	no results available		industry/company	industry	1	Asia	1	to assess safety and preliminary clinical activity of ADR-001 in patients with liver cirrhosis (Child-Pugh score; Grade B) caused by Hepatitis C or Nonalcoholic Steatohepatitis.	No	Mesenchymal Stem Cell	N/A	N/A	N/A	cohort	prospective
NCT01591200	Allogeneic Mesenchymal Stem Cells	Cirrhosis	Dose Finding Study to Assess Safety and Efficacy of Stem Cells in Liver Cirrhosis	interventional	2012	2012	40	18-65	both	Completed	no results available		industry/company	industry	1	Asia	1	This study will evaluate the safety and efficacy of mesenchymal stem cells in patients with cirrhosis of liver. Stem cells will be injected into the hepatic artery. Improvement in various parameters will be observed over 2 years.	Yes	Allogeneic Mesenchymal Stem Cells	randomized	Parallel Assignment	none(open-lable)	N/A	N/A
NCT01875081	autologous bone marrow-derived mesenchymal stem cells	Cirrhosis	REVIVE(Randomized Exploratory Clinical Trial to Evaluate the Safety and Effectiveness of Stem Cell Product in Alcoholic Liver Cirrhosis Patient)	interventional	2012	2012	72	20-70	both	Completed	no results available		industry/company	industry	1	Asia	1	to Evaluate the Safety and Effectiveness of Stem Cell Product in Alcoholic Liver Cirrhosis Patient	Yes	autologous bone marrow-derived mesenchymal stem cells transplantation	randomized	Parallel Assignment	none(open-lable)	N/A	N/A
NCT04689152	autologous Mesenchymal Stem Cells (MSC)	Cirrhosis	Clinical Trial to Evaluate the Efficacy and Safety of Cellgram-LC Administration in Patients With Alcoholic Cirrhosis	interventional	2021	2021	200	20-71	both	recruiting	no results available		industry/company	industry	1	Asia	1	This phase III clinical trial is designed to evaluate the efficacy and safety of autologous Mesenchymal Stem Cells (MSC) injected hepatic artery.	Yes	autologous Mesenchymal Stem Cells (MSC) injected hepatic artery.	randomized	Parallel Assignment	none(open-lable)	N/A	N/A
NCT01378182	allogeneic mesenchymal stem cell transplantation	Cirrhosis	Efficacy of Invitro Expanded Bone Marrow Derived Allogeneic Mesenchymal Stem Cell Transplantation Via Portal Vein or Hepatic Artery or Peripheral Vein in Patients With Wilson Cirrhosis	interventional	2011	2011	10	18-65	both	Completed	no results available		university	other	1	Asia	1	To evaluate the efficacy of Invitro Expanded Bone Marrow Derived Allogeneic Mesenchymal Stem Cell Transplantation Via Portal Vein or Hepatic Artery or Peripheral Vein in Patients With Wilson Cirrhosis	Yes	allogeneic mesenchymal stem cell transplantation	N/A	Single Group Assignment	none(open-lable)	N/A	N/A
NCT02997878	Selected Mesenchymal Stromal Cells derived from human ubmical cord	AILD	A Single-arm,Phase IIa,Safety and Efficacy Trial of Selected MSCs in the Treatment of Patients With PSC & AiH	interventional	2018	2018	56	18-70	both	recruiting	no results available		university	other	3	Europe	3	To evaluate safety and Efficacy Trial of Selected MSCs in the Treatment of Patients With PSC & AiH (Merlin)	Yes	Selected Mesenchymal Stromal Cells derived from human ubmical cord	nonrandomized	Parallel Assignment	none(open-lable)	N/A	N/A
NCT04522869	Umbilical Cord Derived Mesenchymal Stem Cell (UC -MSC) Transplantation	AILD	Umbilical Cord Derived Mesenchymal Stem Cell (UC -MSC) Transplantation for Children Suffering From Biliary Atresia	interventional	2019	2019	34	5 Months to 2 Years (Child)	both	recruiting	no results available		university	other	2	Asia	2	Evaluation Safety and Efficacy of Umbilical Cord Derived Mesenchymal Stem Cell (UC -MSC) Transplantation for Children Suffering From Liver Cirrhosis Due to Biliary Atresia	Yes	Umbilical Cord Derived Mesenchymal Stem Cell (UC -MSC) Transplantation	nonrandomized	Parallel Assignment	none(open-lable)	N/A	N/A
NCT04357600	Allogeneic Umbilical Cord Mesenchymal Stem Cell	Cirrhosis	Umbilical Cord Mesenchymal Stem Cell for Liver Cirrhosis Patient Caused by Hepatitis B	interventional	2018	2018	12	18-65	both	recruiting	no results available		industry/company	industry	1	Asia	1	The study is investigating the effect and safety of stem cells therapy in patients with liver cirrhosis that is specifically caused by Hepatitis B infection	Yes	Allogeneic Umbilical Cord Mesenchymal Stem Cell	N/A	Single Group Assignment	none(open-lable)	N/A	N/A
NCT03963921	Heterologous human adult liver-derived progenitor cells	NAFLD	Safety and Tolerability of HepaStem in Patients With Cirrhotic and Pre-cirrhotic NASH Patients	interventional	2019	2019	23	18-70	both	Completed	no results available		industry/company	industry	1	Europe	1	to determine the safety and tolerability of ascending single and repeated doses of HepaStem administered to patients with cirrhotic and pre-cirrhotic non-alcoholic steato-hepatitis (NASH)	Yes	Heterologous human adult liver-derived progenitor cells	N/A	Single Group Assignment	none(open-lable)	N/A	N/A
NCT03668145	Mesenchymal Stem Cell Transplantation	AILD	Mesenchymal Stem Cell Transplantation for Refractory Primary Biliary Cholangitis	interventional	2017	2017	140	18-70	both	Unknown	no results available		hospital	other	1	Asia	1	This study aimed to investigate the safety and efficacy of mesenchymal stem cells in PBC patients that do not respond to UDCA treatment.	Yes	mesenchymal stem cell transplantation	randomized	Parallel Assignment	quadruple	N/A	N/A
NCT03468699	Autologous Bone Marrow Mononuclear Stem Cell	AILD	Autologous Bone Marrow Mononuclear Stem Cell for Children Suffering From Liver Cirrhosis Due to Biliary Atresia	interventional	2017	2017	20	1-15	both	Unknown	no results available		university	other	1	Asia	1	to evaluate the safety and effectiveness of autologous bone marrow mononuclear stem cell transplantation in the management of Liver Cirrhosis Due to Biliary Atresia	Yes	Autologous Bone Marrow Mononuclear Stem Cell	N/A	Single Group Assignment	none(open-lable)	N/A	N/A
NCT01440309	mesenchymal stem cell	AILD	Efficacy and Safety Study of Allogenic Mesenchymal Stem Cells for Patients With Refractory Primary Biliary Cirrhosis	interventional	2011	2011	20	18-60	both	Unknown	no results available		university	other	1	Asia	1	To explore the therapeutic effect of MSCs for PBC, the investigators plan to conduct an open-label, randomized clinical trial.	Yes	mesenchymal stem cell	randomized	Parallel Assignment	none(open-lable)	N/A	N/A
NCT03826433	human umbilical mesenchymal stem cells	Cirrhosis	hUC Mesenchymal Stem Cells (19#iSCLife®-LC) in the Treatment of Decompensated Hepatitis b Cirrhosishepatitis b Cirrhosis	interventional	2018	2018	20	18-60	both	recruiting	no results available		industry/company	industry	1	Asia	1	Evaluation the safety of using human umbilical mesenchymal stem cells to treat patients with hepatitis B cirrhosis.	Yes	human umbilical mesenchymal stem cells	nonrandomized	Parallel Assignment	none(open-lable)	N/A	N/A
NCT01662973	Umbilical Cord Mesenchymal Stem Cells	AILD	Umbilical Cord Mesenchymal Stem Cells for Patients With Primary Biliary Cirrhosis	interventional	2011	2011	100	18-65	both	Unknown	no results available		hospital	other	1	Asia	1	the safety and efficacy of UC-MSC transplantation for PBC patients will be evaluated.	Yes	Umbilical Cord Mesenchymal Stem Cells for Patients With Primary Biliary Cirrhosis	randomized	Parallel Assignment	none(open-lable)	N/A	N/A
NCT00913289	Autologous Adipose Tissue Derived Stromal Cells	Cirrhosis	Liver Regeneration Therapy Using Autologous Adipose Tissue Derived Stromal Cells	interventional	2009	2009	6	20-80	both	Terminated/withdrawn	no results available		university	other	1	Asia	1	Evaluation the safety of using Autologous Adipose Tissue Derived Stromal Cells	Yes	Autologous Adipose Tissue Derived Stromal Cells	N/A	Single Group Assignment	none(open-lable)	N/A	N/A
NCT00956891	Autologous MSCs Transplantation	Cirrhosis	Therapeutic Effects of Liver Failure Patients Caused by Chronic Hepatitis B After Autologous MSCs Transplantation	observational	2005	2005	158	15-70	both	Completed	no results available		university	other	1	Asia	1	The study aimed to investigate the short-term efficacy and long-term prognosis of liver failure patients caused by hepatitis B after single transplantation with autologous marrow mesenchymal stem cells (MMSCs).	No	Autologous MSCs Transplantation		N/A	N/A	case-control	retrospective
NCT00393185	Non-myeloablative Hematopoietic Stem Cell Transplantation	AILD	Stem Cell Transplantation in Patients With Primary Biliary Cirrhosis	interventional	2006	2006	0	18-65	both	Terminated/withdrawn	no results available	No liver-related death or LTx over the 2-year (extended to 5 years) follow-up; Normalization of serum alkaline phosphatase over 6 months;Amelioration of PBC histological stage with reduction of both inflammation and fibrosis scores 42 [ Time Frame: 5 years after transplant ]	hospital	other	1	America	1	to evaluate the safety and effectiveness of Stem Cell Transplantation in Patients With Primary Biliary Cirrhosis	Yes	Non-myeloablative Hematopoietic Stem Cell Transplantation	N/A	Single Group Assignment	none(open-lable)	N/A	N/A
NCT01062750	adipose tissue derived stromal cells dosage	Cirrhosis	Liver Regeneration Therapy by Intrahepatic Arterial Administration of Autologous Adipose Tissue Derived Stromal Cells	interventional	2012	2012	2	20-80	both	Completed	no results available		university	other	1	Asia	1	Evaluation the safety of using Autologous Adipose Tissue Derived Stromal Cells	Yes	single administration of autologous adipose tissue derived stroma cells via intrahepatic arterial catheterization	N/A	Single Group Assignment	none(open-lable)	N/A	N/A
NCT01231022	peripheral hematopoietic stem cell	Other	Study the Role of Stem Cell in Curing Drug Induced Liver Injury in Metastatic Breast Cancer (MBC)	observational	2010	2010	52	18-70	both	Completed	no results available		hospital	other	1	Asia	1	The investigators want to know the role of Peripheral hematopoietic stem cell infusion in avoiding Drug Induced Liver Injury,and also try to research SNPs genotyping associated with Drug Induced Liver Injury.	No		N/A	N/A	N/A	cohort	cross-sectional
NCT02171949	bone marrow mononuclear cells.	Cirrhosis	Clinical Trial for Evaluation of Treatment With Multiple Infusions of Mononuclear Bone Marrow Cells in Patients With Chronic Liver Diseases	interventional	2015	2015	30	18-70	both	Unknown	no results available		hospital	other	1	America	3	to evaluate the safety and efficacy of multiple infusions of mononuclear bone marrow cells in patients with chronic liver diseases.	Yes	Infusion of bone marrow mononuclear cells.	randomized	Parallel Assignment	triple	N/A	N/A
NCT00832247	Autologous Bone Marrow Mononuclear Cells	Cirrhosis	Autologous Bone Marrow Mononuclear Cells in Liver Cirrhosis	interventional	2009	2009	15	18-75	both	Unknown	no results available		university	other	1	America	6	to evaluate feasibility, safety and kinetics of cellular therapy with autologous bone marrow-derived mononuclear cells (BMMC) in patients with liver cirrhosis due to virus C hepatitis.	Yes	Autologous bone marrow mononuclear cells infusion	N/A	Single Group Assignment	none(open-lable)	N/A	N/A
NCT01950429	stem cell	Other	Evaluation of Sickle Cell Liver Disease	observational	2013	2013	42	18-99	both	Completed	no results available		other	other	1	America	1	The intention of the study is to use sickle cell disease as a model of predicting markers of progression and regression of liver disease.	No		N/A	N/A	N/A	cohort	prospective
NCT01221454	Allogenic bone marrow stem cells	Liver fialure	Allogenic Bone Marrow Stem Cell Transplantation in Liver Failure	interventional	2010	2010	60	16-65	both	Unknown	no results available		university	other	1	Asia	1	The purpose of this study is to evaluate the therapeutic efficacy of allogenic bone marrow stem cells (BMSCs) transplantation in patients with liver failure caused by hepatitis B infection.	Yes	Allogenic bone marrow stem cells	nonrandomized	Parallel Assignment	none(open-lable)	N/A	N/A
NCT01322906	Allogenic bone marrow stem cells	Liver fialure	Allogeneic Bone Marrow Mesenchymal Stem Cells Transplantation in Patients With Liver Failure Caused by Hepatitis B Virus (HBV)	interventional	2011	2011	120	16-65	both	Unknown	no results available		university	other	1	Asia	1	Allogeneic Bone Marrow Mesenchymal Stem Cells Transplantation in Patients with Liver Failure Caused by hepatitis B virus (HBV)	Yes	Group 1 Thirty of the enrolled patients were assigned to Group B to receive comprehensive treatment, as well as allogeneic bone marrow mesenchymal stem cells transplantation by peripheral vein(2×105/Kg, once a week, 4 times). Other: Group 2 Thirty of the enrolled patients were assigned to Group B to receive comprehensive treatment, as well as allogeneic bone marrow mesenchymal stem cells transpla…	randomized	Parallel Assignment	none(open-lable)	N/A	N/A
NCT03957655	Stem cells from human exfoliated deciduous teeth	Cirrhosis	Safety and Efficacy of SHED for Decompensated Liver Cirrhosis	interventional	2019	2019	40	18-70	both	not recruiting	no results available		industry/company	industry	1	Asia	2	Stem cells from human exfoliated deciduous teeth (SHED) has been shown to be safe and effective for liver diseases. Randomization controlled studies are needed to confirm the long term effect of SHED treatment for liver cirrhosis.	Yes	Stem cells from human exfoliated deciduous teeth (SHED)	randomized	Parallel Assignment	single	N/A	N/A
NCT00382278	Autologous bone marrow-derived mononuclear cells	Cirrhosis	Safety Study of Autologous Stem Cell in Liver Cirrhosis	interventional	2005	2005	15	18-75	both	Terminated/withdrawn	no results available		university	other	1	America	1	to evaluate feasibility, safety and kinetics of cellular therapy with bone marrow-derived mononuclear cells (ABMMC) in patients with liver cirrhosis	Yes	Autologous bone marrow-derived mononuclear cells infusion	N/A	Single Group Assignment	none(open-lable)	N/A	N/A
NCT02946554	HepaStem	Liver fialure	Phase II Safety Study of 2 Dose Regimens of HepaStem in Patients With ACLF	interventional	2016	2016	24	18-70	both	Completed	no results available		industry/company	industry	1	Europe	2	assess the safety of different dose regimens of HepaStem in cirrhotic Patients with ACLF or with acute decompensation at risk of developing ACLF up to Day 28 of the active study period.	Yes	HepaStem	N/A	Single Group Assignment	none(open-lable)	N/A	N/A
